# Supplementary material for: Immunological Effects of Cold Atmospheric Plasma-Treated Cells in Comparison with Those of Cells Treated with Lactaptin-Based Anticancer Drugs
Source: MDPI journal article supplement (doi:10.3390/biophysica2030025), 2022-09-01
Supplement: s1 [file s1]

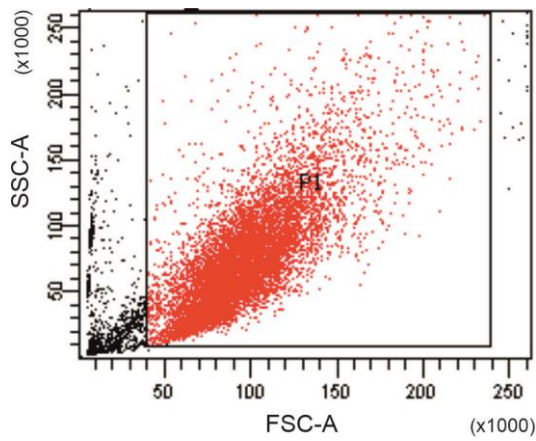

**Figure S1.** Analysis of PBMC by flow cytometry in SSC/FSC graphs. These graphs were used to gate live cell population (P1) and to exclude debris.

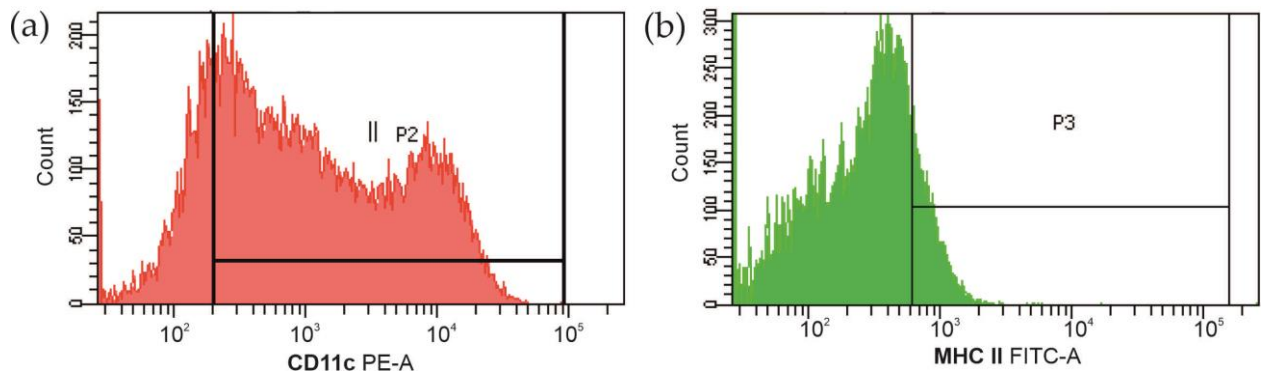

**Figure S2.** Gating on a population of CD11c-positive cells for the analysis of MHC II-positive cells. Representative images of RL2-treated MX-7 cells incubated with bone marrow dendritic cells; (a) CD11c-positive population; (b) MHC II-positive population among CD11c-positive cells.

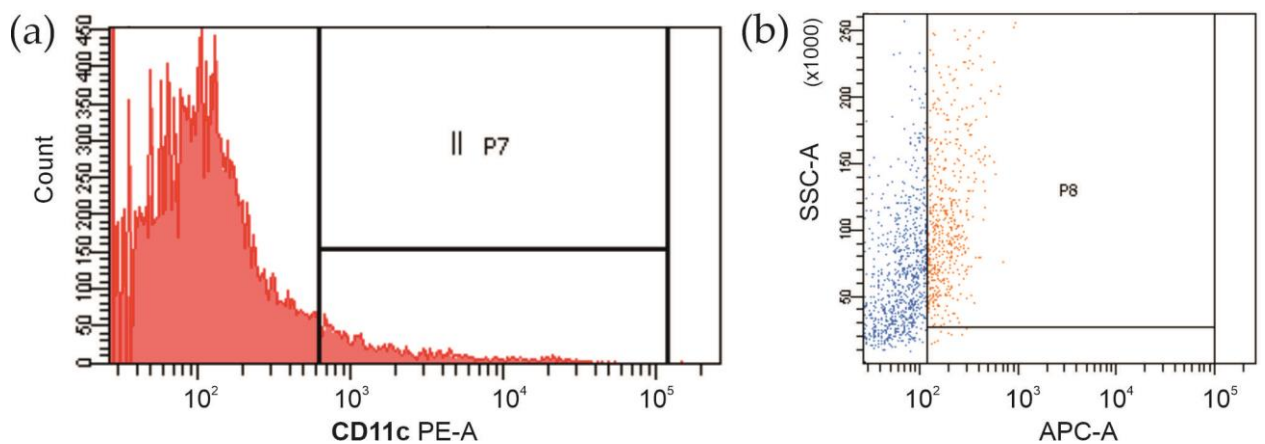

**Figure S3.** Gating on a population of CD11c-positive mouse spleen cells for analysis of Cell Tracker Red-stained cells. Representative image of spleen cells of mice injected with RL2-treated Cell Tracker Red MX-7 cells (APC fluorescent channel). (a) CD11c-positive population; (b) APC-positive population among CD11c-positive cells.

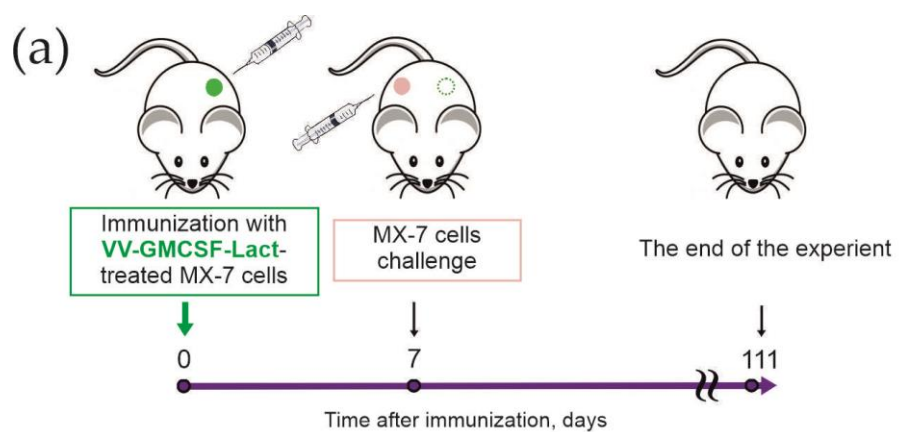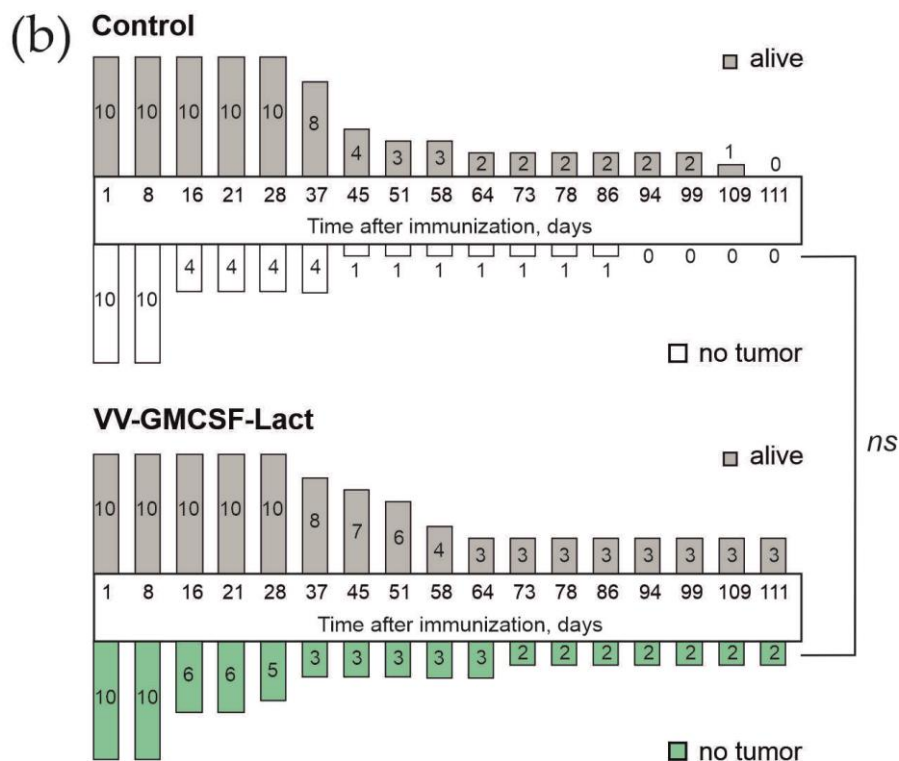

**Figure S4.** Immunization of C3H/He mice with MX-7 cells treated with recombinant vaccinia virus VV-GMCSF-Lact (0.5 PFU/cell). (a) Scheme of the experiment. C3H/He mice were immunized with VV-GMCSF-Lact-treated MX-7 cells (7×10<sup>5</sup> cells/animal) - dot "0" on the x-axis. After 7 days, mice were injected with live MX-7 cells (7×10<sup>5</sup>); (b) The number of live mice and mice without tumors in groups in dynamics. Differences between groups in the number of tumor-free mice were calculated using non-parametric Pearson's chi-square statistics. ns - differences between groups are not significant.
