# Supplementary material for: Immunological Effects of Cold Atmospheric Plasma-Treated Cells in Comparison with Those of Cells Treated with Lactaptin-Based Anticancer Drugs
Source: MDPI journal article supplement (doi:10.3390/biophysica2030025), 2022-09-01
Supplement: s1 [file s1]

Archive with 1 entries (1 files):
- biophysica-1885222-supplementary.pdf
